# Supplementary material for: Ginkgo seed extract promotes longevity and stress resistance of Caenorhabditis elegans
Source: Royal Society of Chemistry journal article supplement (doi:10.1039/d1fo02823e), 2021-01-01
Supplement: d1fo02823e1.pdf [file d1fo02823e1.pdf]

## Supplementary files

Table S1 qRT-PCR primer sequence

| Gene name       | Forward primer (5'-3')     | Reverse primer (3'-5')      |
|-----------------|----------------------------|-----------------------------|
| <i>Actin-1</i>  | GCTCTTGCCCCATCAACCAT       | GCCGGACTCGTCGTATTCTT        |
| <i>Elo-6</i>    | AATCTCTGGAATGCGGGTCTTGC    | CGGCTGAAGAACTCGTGGAGAAG     |
| <i>Gpx-7</i>    | ACAGGGTGGAACCTTTTTTCGATGC  | ATACCATGCATACCTCGCCACAAC    |
| <i>Gpx-8</i>    | ACTGGGCGACTCTATCGGGATATTAG | CGTAAGTCAATTTGTCCTTCGGCAAG  |
| <i>F54C8.1</i>  | GCTCAAGTTACGGCGAGTAGTGG    | TGCCTTCATCGCTCTATCAAGTGC    |
| <i>Y39G8B.1</i> | CCAACTTCACCCACAGCCAGATC    | AGTACCCGACCACCACAATACCC     |
| <i>Fat-5</i>    | CCAAGCCTGAACCTGATGTCCAAG   | CGAAGCAGAAGATTCCGACCAAGG    |
| <i>Pod-2</i>    | TGTCTACGCCACTGCCGAGTC      | TCGCCATTCATCACACGCTTATCC    |
| <i>Fasn-1</i>   | TCGGGTCGTGTCGGGTGAAG       | CCTGAGTTGTCCGTCGTCTTGTC     |
| <i>Bec-1</i>    | GAAGCCGAACGTCAATATGCAGAAG  | TCACCAACAATTCCATCAACCCAAATG |

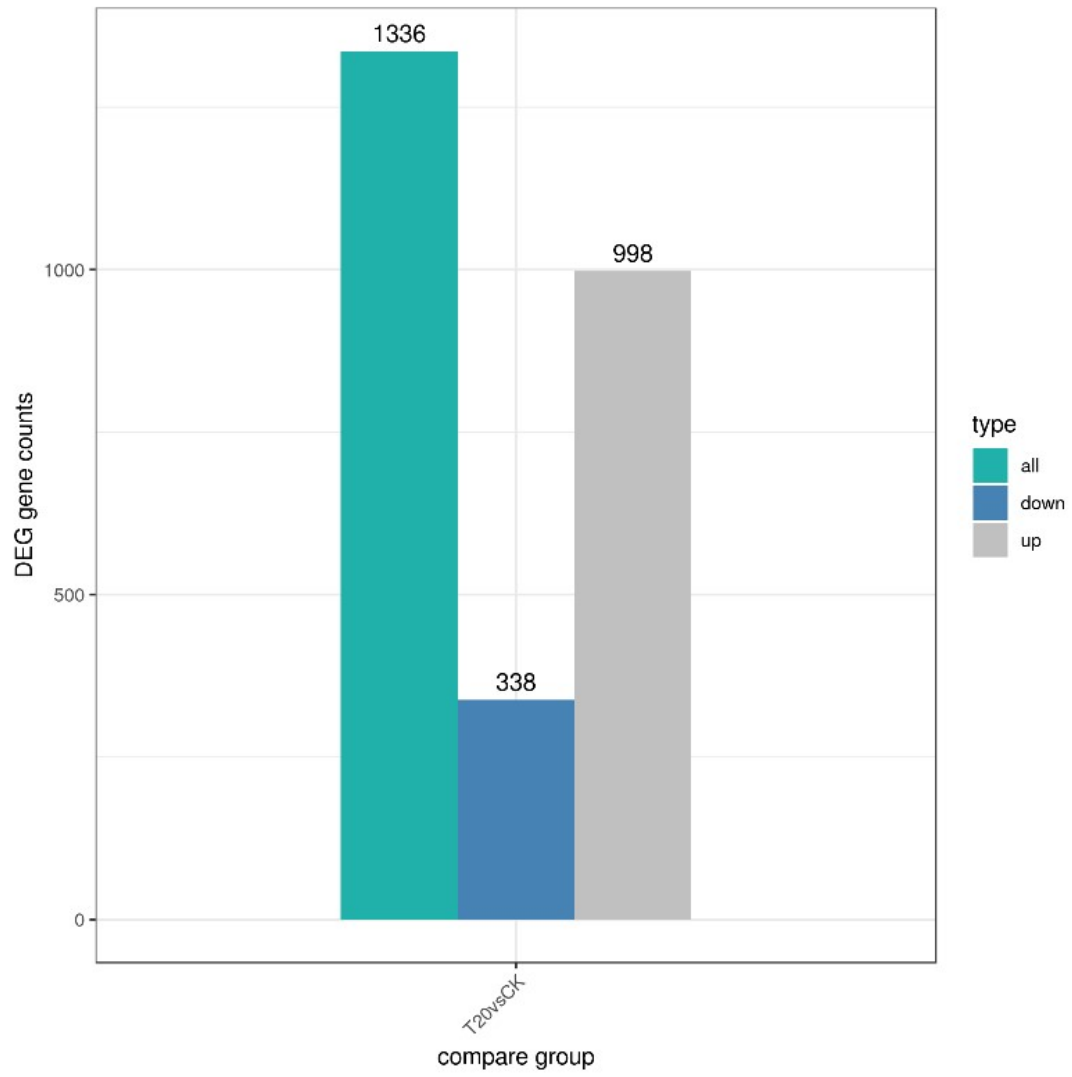

Fig. S1 Statistical histogram of the number of differential genes between GSP-E treatments and control

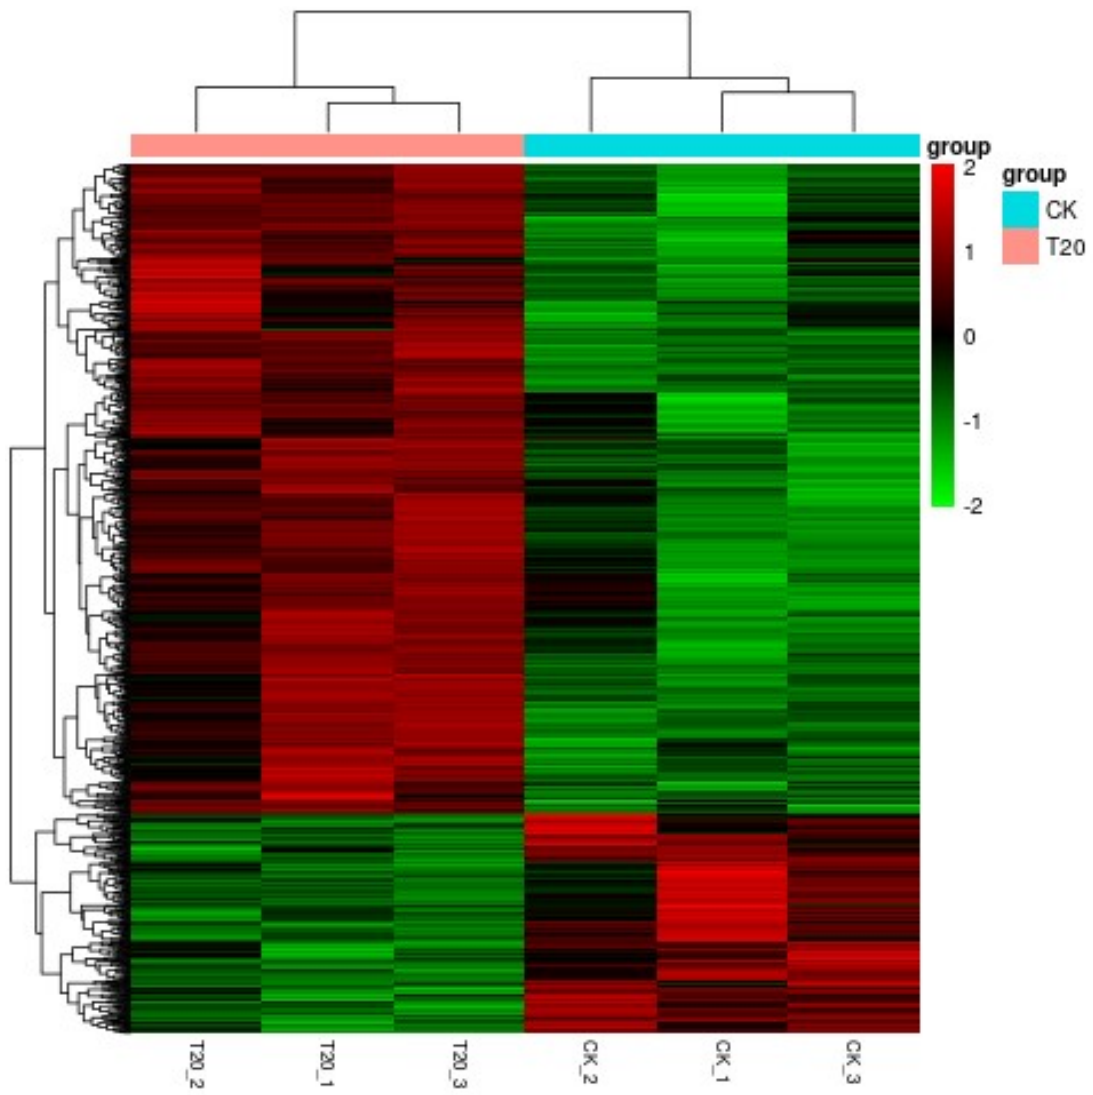

Fig. S2 Cluster heat map of differentially expressed genes between GSP-E treatments and control

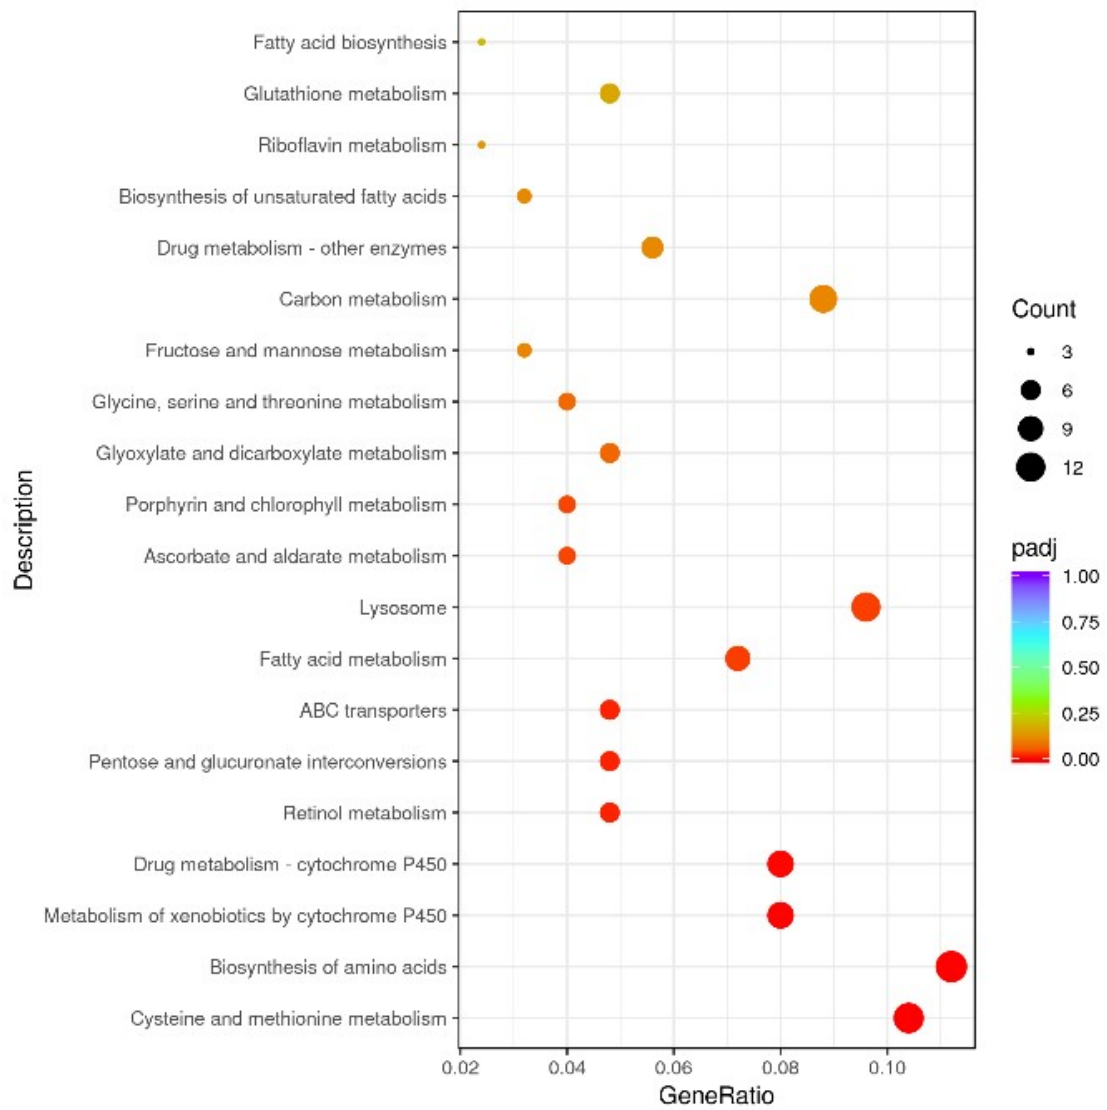

Fig. S3 KEGG enrichment scatter plot in GSP-E treatment groups

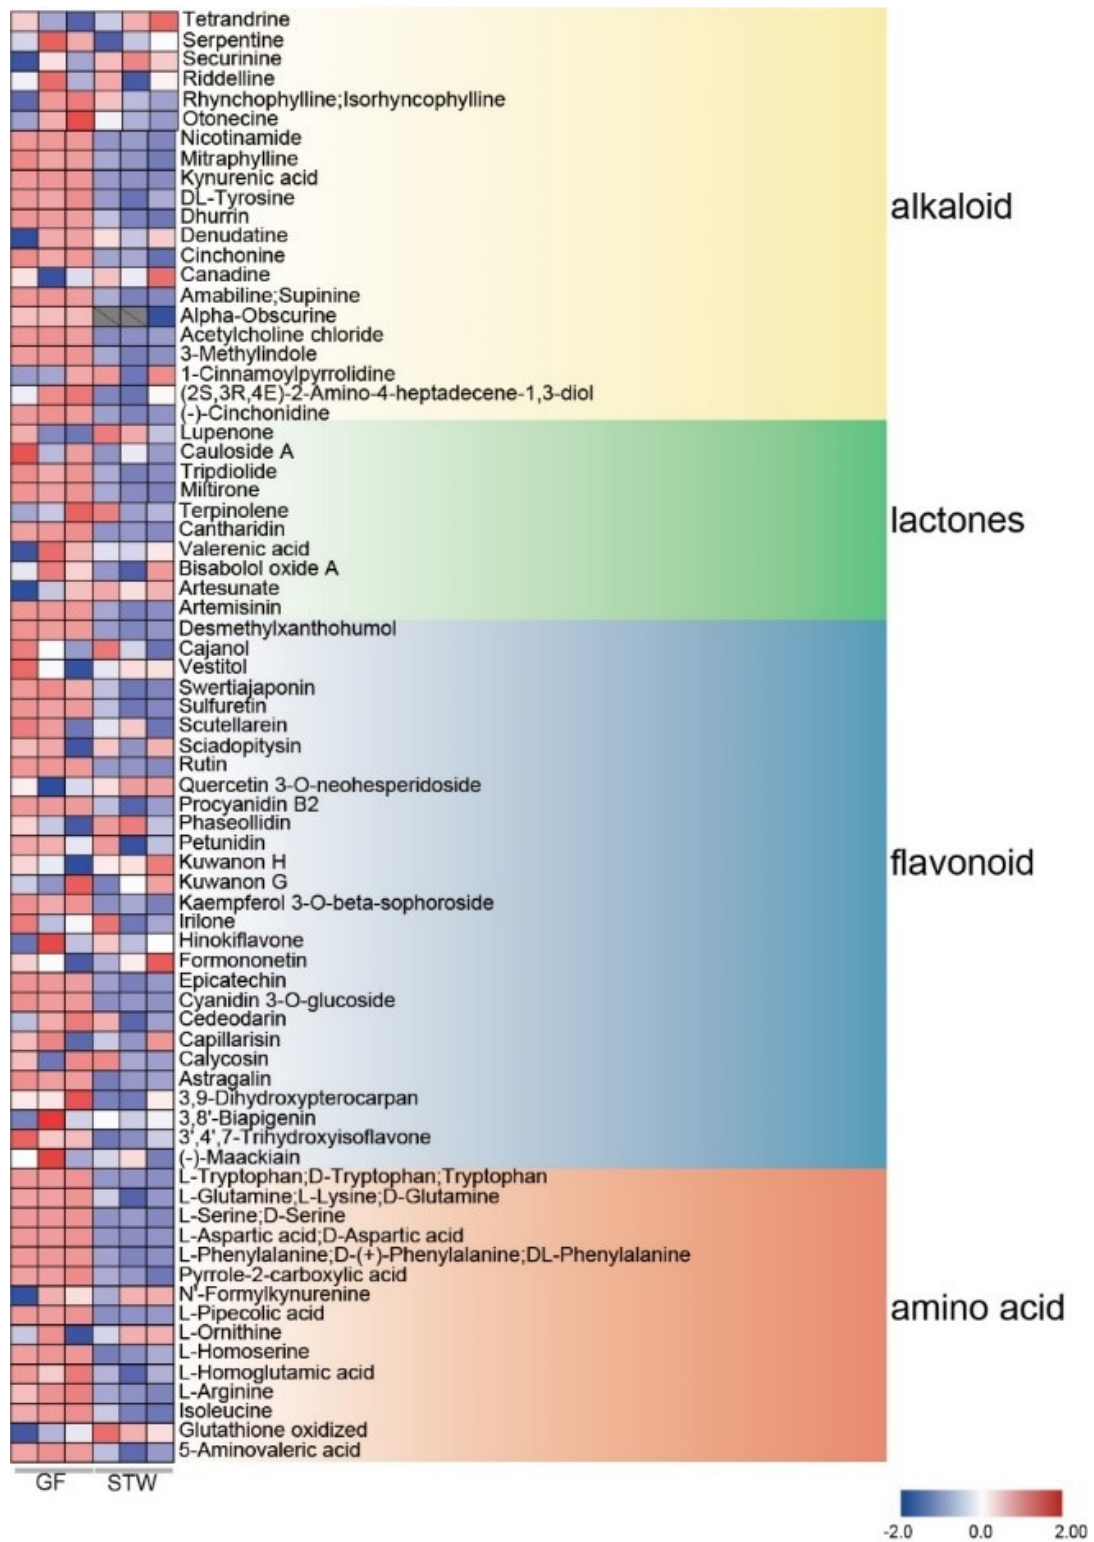

Fig. S4 Heat map of the differential metabolites between ginkgo seed powder and GSP-E

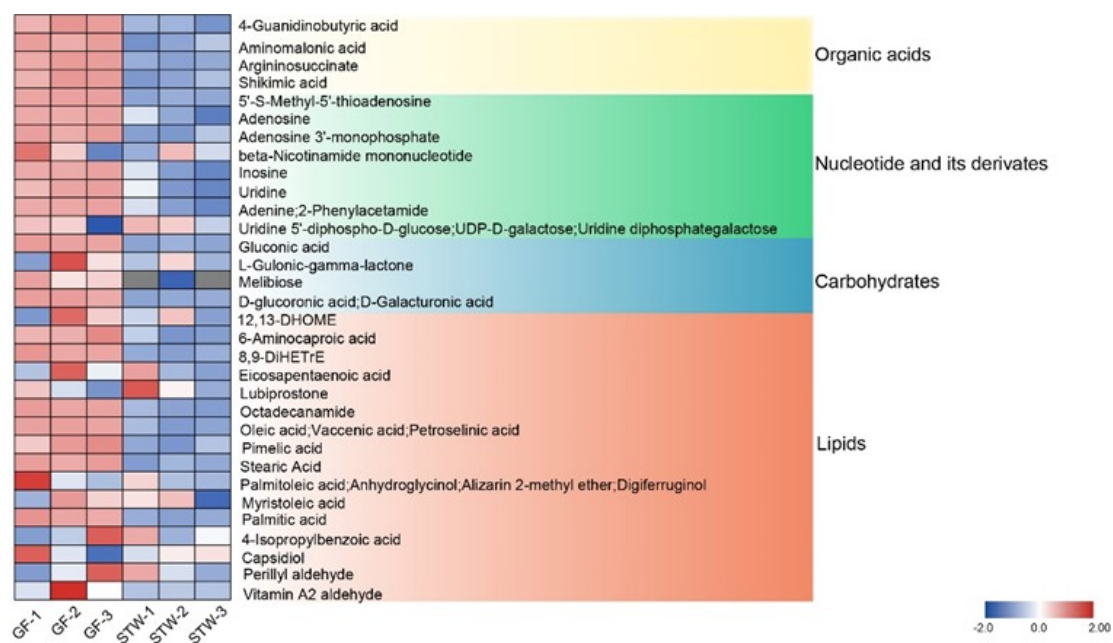

Fig. S5 Heat map of the differential metabolites between ginkgo seed powder and GSP-E

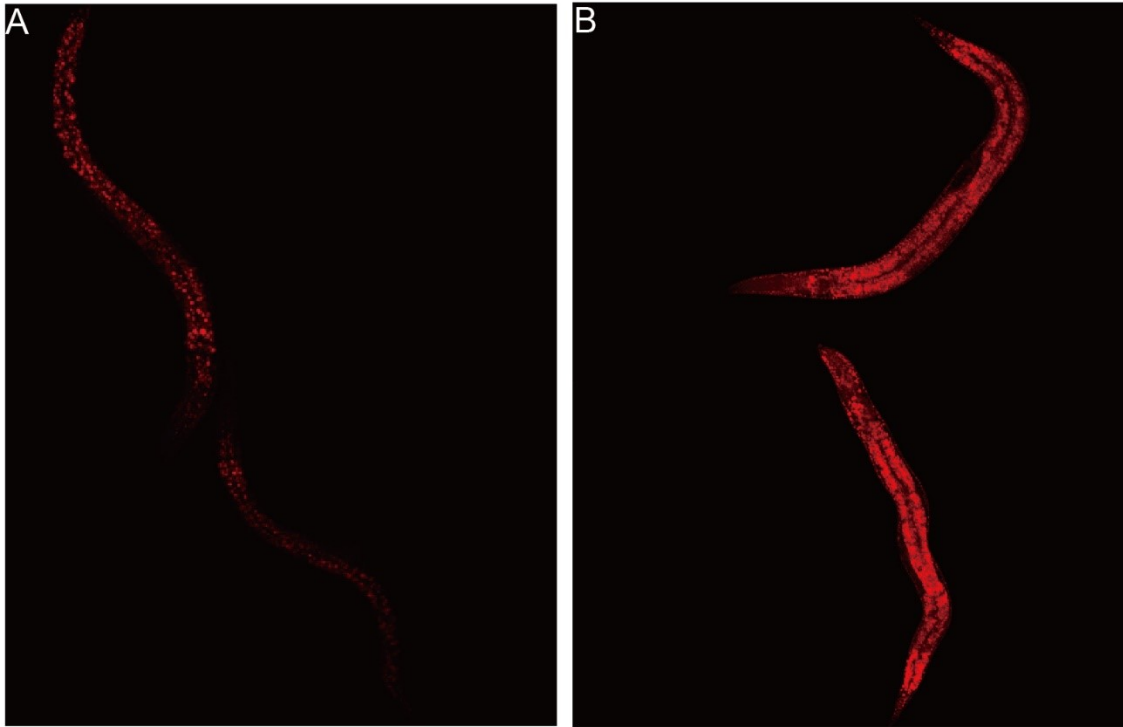

Fig. S6 Nile Red staining

A. The 0 mg/mL control group. B. The 20 mg/mL treatment group.
